# Supplementary material
Source: Springer Nature journal article supplement (https://mijn.bsl.nl/resource/supplementary/13047_2008_77_MOESM2_ESM.pdf/7109766)
Supplement: MOESM2 [file 7109766]

| <i>Question</i>                                                                                                            | <i>Behaviour subscale</i> |
|----------------------------------------------------------------------------------------------------------------------------|---------------------------|
| During the past week how often did you examine your feet?                                                                  | Preventative              |
| During the past week how often did you wash your feet?                                                                     | Preventative              |
| During the past week how often did you check the inside of your shoes?                                                     | Preventative              |
| During the past week how often did you use moisturising oils or creams for your feet?                                      | Preventative              |
| During the past week how often did you change your socks?                                                                  | Preventative              |
| During the past week how often did you test the water temperature with your hand / elbow before taking a bath or a shower? | Preventative              |
| During the past week how often did you walk barefoot indoors?                                                              | Potentially damaging      |
| During the past week how often did you walk barefoot outdoors?                                                             | Potentially damaging      |
| During the past week how often did you wear shoes without the socks?                                                       | Potentially damaging      |
| In general, how often do you use chemical agents or plasters to remove corns and calluses?                                 | Potentially damaging      |
| In general, how often do you yourself treat corns or calluses with a blade?                                                | Potentially damaging      |
| In general, how often do you cut your toenails straight across?                                                            | Preventative              |
| In general, how often do you have your feet measured when buying a new pair of shoes?                                      | Preventative              |
| In general, how often do you wear trainers/sneakers or lace-up shoes?                                                      | Preventative              |
| In general, how often do you rely on feeling the fit of the shoes when buying a new pair?                                  | Potentially damaging      |
| In general, how often do you wear sandals or slippers?                                                                     | Potentially damaging      |
| In general, when your feet feel cold at night, how often do you use hot water bottles/heating pads to warm them?           | Potentially damaging      |
